# Supplementary material for: Instantly switchable adhesion of bridged fibrillar adhesive via gecko-inspired detachment mechanism and its application to a transportation system
Source: Royal Society of Chemistry journal article supplement (doi:10.1039/c3nr02008h), 2013-01-01
Supplement: c3nr02008h.pdf [file c3nr02008h.pdf]

# Supporting information

## **Instantly switchable adhesion of bridged fibrillar adhesive via gecko-inspired detachment mechanism and its application to a transportation system**

Won-Gyu Bae,<sup>†a,b</sup> Doogon Kim<sup>†b</sup> and Kahp-Yang Suh<sup>\*a,b,c</sup>

<sup>a</sup> *Interdisciplinary Program of Bioengineering, Seoul National University, Seoul 151-742, Republic of Korea.;*

*E-mail: sky4u@snu.ac.kr*

<sup>b</sup> *Division of WCU Multiscale Mechanical Design, School of Mechanical and Aerospace Engineering, Seoul National University, Seoul 151-742, Republic of Korea.*

<sup>c</sup> *Institute of Biological Engineering, Seoul National University, Seoul 151-742, Republic of Korea.*

<sup>†</sup> W. G. Bae and D. Kim contributed equally to this work.

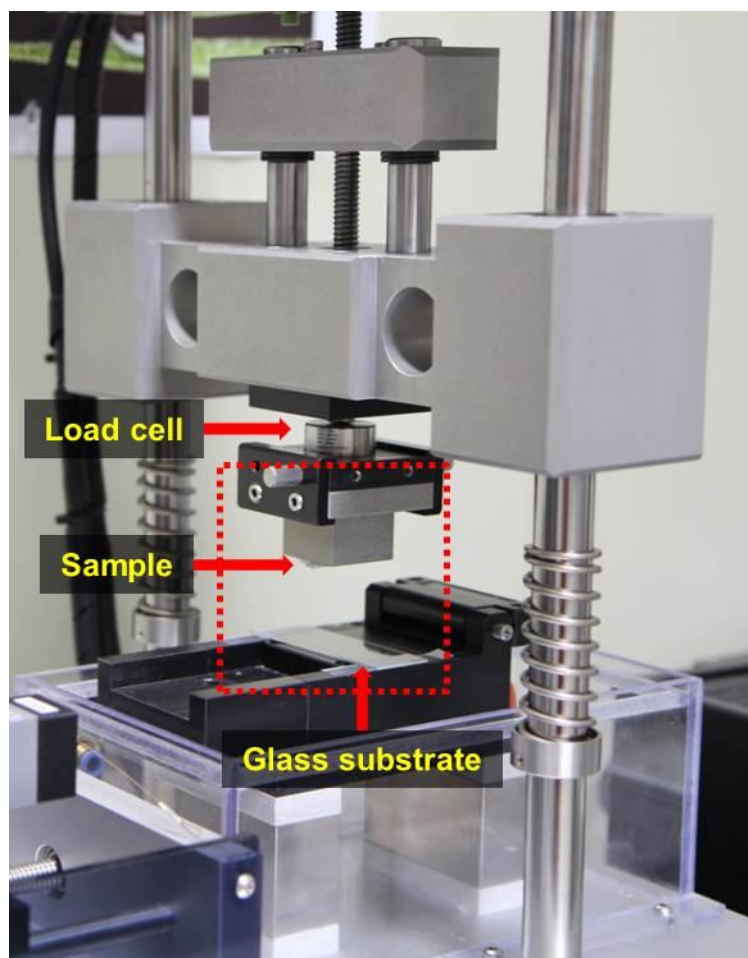

**Fig. S1** A custom-built adhesion measurement system. The system is composed of a motorized driving part with a load cell moving in  $z$  (vertical) direction for installing an adhesive sample and a finely flat stage for contact surface.

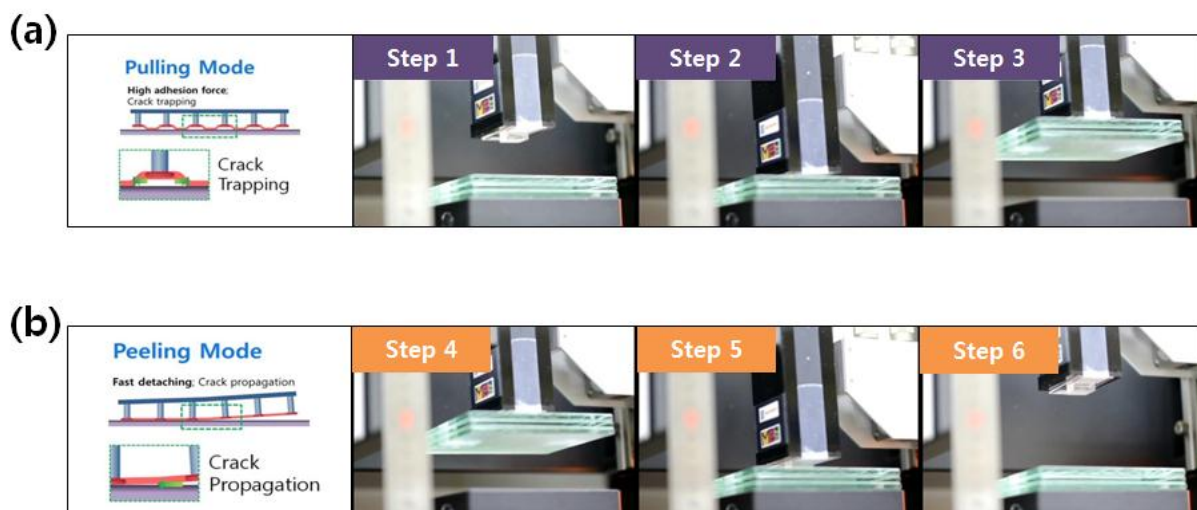

**Fig. S2** Video snapshots show the sequential steps of pulling and peeling modes of the bridged micropillars. Each picture corresponds to the schematic illustration of the transportation system presented in Figure 6a.

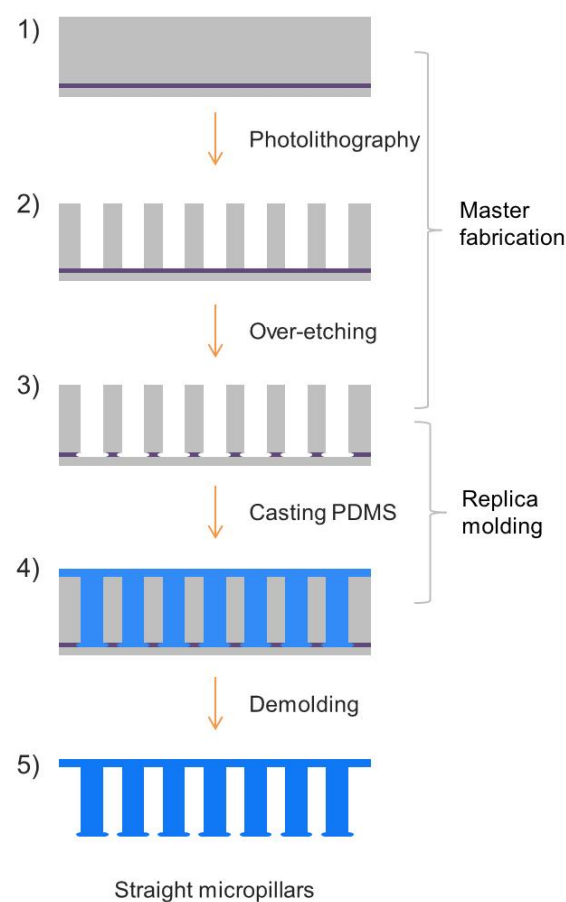

**Fig. S3** A schematic illustration for fabricating the SOI master mold and replicating mushroom-like micropillars.

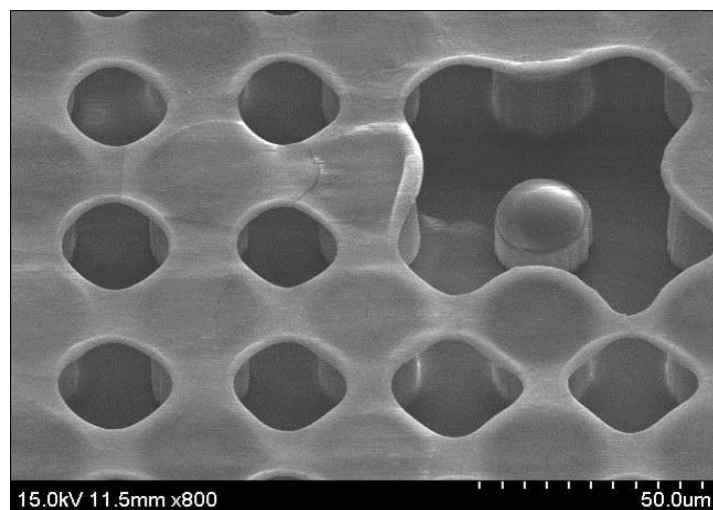

**Fig. S4** An SEM image of the bridged micropillars with one arbitrary defect site, showing that the membrane of ~800 nm thickness is uniformly connecting the pillars in a grid, square pattern.
